# Supplementary material
Source: PubMed Central journal article supplement (PMC2670068)
Supplement: NIHMS101436-supplement-supplement_1.pdf [file NIHMS101436-supplement-supplement_1.pdf]

*The following text is included for refereeing purpose only. It will not be part of the paper.*

*Proof of (A1).* It can be shown by following the same steps as the proof of (A3) with  $\zeta = 0$ .

*Proof of (A2).* For convenience, drop the subscript  $i$  and define

$$\begin{aligned} A &= g(X); \\ Z_k &= A^{1/2}(\epsilon_k - \bar{\epsilon}.); \\ V &= \bar{Y}. + (\zeta/m)^{1/2} \sum_{j=1}^m c_{b,j} Y_j = X + A^{1/2} \{ \bar{\epsilon}. + (\zeta/m)^{1/2} \sum_{j=1}^m c_{b,j} \epsilon_j \}. \end{aligned}$$

Note that

$$\begin{aligned} \text{cov}\{ \bar{\epsilon}., \bar{\epsilon}. + (\zeta/m)^{1/2} \sum_{j=1}^m c_{b,j} \epsilon_j \} &= 1/m; \\ \text{cov}\{ \epsilon_k, \bar{\epsilon}. + (\zeta/m)^{1/2} \sum_{j=1}^m c_{b,j} \epsilon_j \} &= (1/m) + (\zeta/m)^{1/2} c_{b,k}; \\ \text{var}(\epsilon_k - \bar{\epsilon}.) &= (m-1)/m. \end{aligned}$$

Now calculate some moments:

$$\begin{aligned} \text{var}(Z_k|X) &= A(m-1)/m; \\ \text{var}(V|X) &= A(1+\zeta)/m; \\ \text{cov}(Z_k, V|X) &= A(\zeta/m)^{1/2} c_{b,k}. \end{aligned}$$

Note that  $Z_k$  and  $V$  are jointly normally distributed. We thus have

$$\begin{aligned} E(Z_k|V, X) &= \frac{\text{cov}(Z_k, V)}{\text{var}(V)}(V - X) = \frac{(\zeta/m)^{1/2} c_{b,k}}{(1+\zeta)/m} (V - X); \\ \text{var}(Z_k|V, X) &= \text{var}(Z_k) - \text{cov}^2(Z_k, V)/\text{var}(V) = A \left\{ \frac{m-1}{m} - \frac{(\zeta/m) c_{b,k}^2}{(1+\zeta)/m} \right\}. \end{aligned}$$

We have thus shown that

$$E(Z_k^2|V, X) = A(m-1)/m + \frac{(\zeta/m) c_{b,k}^2}{(1+\zeta)/m} \left\{ \frac{(V-X)^2}{(1+\zeta)/m} - A \right\}.$$

Note that  $S = (m-1)^{-1} \sum_{k=1}^m Z_k^2$  and  $\sum_k c_{b,k}^2 = 1$ . Now putting the subscript  $i$  back in and remembering that  $A = g(X_i)$ , we have shown that

$$\begin{aligned} E\{S_i|X_i, W_{b,i}(\zeta)\} &= g(X_i) + \frac{\{1/(m-1)\}(\zeta/m)}{(1+\zeta)/m} \left[ \frac{\{W_{b,i}(\zeta) - X_i\}^2}{(1+\zeta)/m} - g(X_i) \right] \\ &= g(X_i) + s(\zeta) \left[ \frac{\{W_{b,i}(\zeta) - X_i\}^2}{(1+\zeta)/m} - g(X_i) \right]. \end{aligned}$$

*Proof of (A3).* Because  $[W_{b,i}(\zeta)|X_i] \sim N\{X_i, g(X_i)(1+\zeta)/m\}$ , we have

$$\begin{aligned} &E [K_h \{W_{b,i}(\zeta) - x_0\} g(X_i)] \\ &= \int \int \frac{1}{\{(1+\zeta)g(x)/m\}^{1/2}} K_h(w - x_0) g(x) \phi \left[ \frac{x - w}{\{(1+\zeta)g(x)/m\}^{1/2}} \right] f_X(x) dw dx. \end{aligned}$$

Now make the change of variables:

$$z = (w - x_0)/h \rightsquigarrow w = x_0 + zh,$$

so that

$$\begin{aligned} &E [K_h \{W_{b,i}(\zeta) - x_0\} g(X_i)] \\ &= \int \int \frac{1}{\{(1+\zeta)g(x)/m\}^{1/2}} K(z) g(x) \phi \left[ \frac{x - x_0 - zh}{\{(1+\zeta)g(x)/m\}^{1/2}} \right] f_X(x) dz dx. \end{aligned}$$

Make the further change of variables

$$s = \frac{x - x_0 - zh}{\{(1+\zeta)/m\}^{1/2}} \rightsquigarrow x = x_0 + zh + s\{(1+\zeta)/m\}^{1/2},$$

so that

$$\begin{aligned} &E [K_h \{W_{b,i}(\zeta) - x_0\} g(X_i)] \\ &= \int \int \frac{1}{g^{1/2}[x_0 + zh + s\{(1+\zeta)/m\}^{1/2}]} K(z) g [x_0 + zh + s\{(1+\zeta)/m\}^{1/2}] \\ &\quad \times \phi (s/g^{1/2}[x_0 + zh + s\{(1+\zeta)/m\}^{1/2}]) f_X [x_0 + zh + s\{(1+\zeta)/m\}^{1/2}] dz ds. \end{aligned}$$

As  $h \rightarrow 0$ , because  $\int K(z) dz = 1$ , the right hand side of the above equation converges to

$$\begin{aligned} &\int \frac{1}{g^{1/2}\{x_0 + s\{(1+\zeta)/m\}^{1/2}\}} g [x_0 + s\{(1+\zeta)/m\}^{1/2}] \\ &\quad \times \phi (s/g^{1/2}[x_0 + s\{(1+\zeta)/m\}^{1/2}]) f_X [x_0 + s\{(1+\zeta)/m\}^{1/2}] ds. \end{aligned}$$

Then note that

$$\begin{aligned}
& \lim_{\zeta \rightarrow -1} \int \frac{1}{g^{1/2}[x_0 + s\{(1 + \zeta)/m\}^{1/2}]} g [x_0 + s\{(1 + \zeta)/m\}^{1/2}] \\
& \quad \times \phi (s/g^{1/2}[x_0 + s\{(1 + \zeta)/m\}^{1/2}]) f_X [x_0 + s\{(1 + \zeta)/m\}^{1/2}] ds \\
& = g(x_0)f_X(x_0) \int \frac{1}{g^{1/2}(x_0)} \phi\{s/g^{1/2}(x_0)\} ds \\
& = g(x_0)f_X(x_0),
\end{aligned}$$

as claimed.

*Proof of (A4).* The term in question is

$$\begin{aligned}
\mathcal{C}(h, \zeta) &= s(\zeta) \int \int K_h(w - x_0) f_X(x) g(x) \frac{1}{\{g(x)(1 + \zeta)/m\}^{1/2}} \phi \left[ \frac{w - x}{\{g(x)(1 + \zeta)/m\}^{1/2}} \right] \\
& \quad \times \left( \left[ \frac{w - x}{\{g(x)(1 + \zeta)/m\}^{1/2}} \right]^2 - 1 \right) dw dx.
\end{aligned}$$

Making the change of variables  $z = (w - x_0)/h$  and letting  $h \rightarrow 0$ , we have

$$\mathcal{C}(h, \zeta) \rightarrow \frac{s(\zeta)}{(1 + \zeta)/m} \int f_X(x) g^{1/2}(x) \phi \left[ \frac{x_0 - x}{\{g(x)(1 + \zeta)/m\}^{1/2}} \right] \left( \left[ \frac{x_0 - x}{\{g(x)(1 + \zeta)/m\}^{1/2}} \right]^2 - 1 \right) dx.$$

Then by making the change of variables,  $x = x_0 + s\{(1 + \zeta)/m\}^{1/2}$ , it is seen that (A4) equals

$$\lim_{\zeta \rightarrow -1} \frac{\zeta/(m - 1)}{1 + \zeta} \int H_s[x_0 + s\{(1 + \zeta)/m\}^{1/2}] ds.$$

Note that  $\int H_s(x_0) ds = 0$ , so we can apply L'Hospital's rule so that (A4) equals

$$\lim_{\zeta \rightarrow -1} \frac{\zeta/(m - 1)}{2(1 + \zeta)^{1/2}} \int \frac{s}{m^{1/2}} H_s^{(1)}[x_0 + s\{(1 + \zeta)/m\}^{1/2}] ds.$$

Note that  $\int s H_s^{(1)}(x_0) ds = 0$ , so we can apply L'Hospital's rule again so that (A4) equals

$$-\frac{1}{2m(m - 1)} \int s^2 H_s^{(2)}(x_0) ds.$$

*Proof of (A9).*

$$\begin{aligned}
& [E\{\widehat{\Lambda}(x_0)|\widetilde{Y}\}]^2 \\
= & (4n)^{-1} E \left( \sum_{s=\pm 1} \sum_{k=0}^K \{d_k/v(x_0, \zeta_k)\} K_h\{W_i(s, \zeta_k) - x_0\} Q[Y_i, W_i(s, \zeta_k), g\{W_i(s, \zeta_k), \zeta_k\}] \right)^2 \\
= & (4n)^{-1} \sum_{s_1=\pm 1} \sum_{s_2=\pm 1} \sum_{k_1=0}^K \sum_{k_2=0}^K \{d_{k_1}/v(x_0, \zeta_{k_1})\} \{d_{k_2}/v(x_0, \zeta_{k_2})\} \\
& \times E(K_h\{W_i(s_1, \zeta_{k_1}) - x_0\} K_h\{W_i(s_2, \zeta_{k_2}) - x_0\} \\
& \times Q[Y_i, W_i(s_1, \zeta_{k_1}), g\{W_i(s_1, \zeta_{k_1}), \zeta_{k_1}\}] Q[Y_i, W_i(s_2, \zeta_{k_2}), g\{W_i(s_2, \zeta_{k_2}), \zeta_{k_2}\}]) \\
= & (n)^{-1} \{d_0/v(x_0, 0)\}^2 K_h^2\{W_i(1, 0) - x_0\} Q^2[Y_i, W_i(1, 0), g\{W_i(s, 0), 0\}] \\
& + (4n)^{-1} \sum_{s_1=\pm 1} \sum_{s_2=\pm 1} \sum_{k_1=1}^K \sum_{k_2=1}^K \{d_{k_1}/v(x_0, \zeta_{k_1})\} \{d_{k_2}/v(x_0, \zeta_{k_2})\} \\
& \times E(K_h\{W_i(s_1, \zeta_{k_1}) - x_0\} K_h\{W_i(s_2, \zeta_{k_2}) - x_0\} \\
& \times Q[Y_i, W_i(s_1, \zeta_{k_1}), g\{W_i(s_1, \zeta_{k_1}), \zeta_{k_1}\}] Q[Y_i, W_i(s_2, \zeta_{k_2}), g\{W_i(s_2, \zeta_{k_2}), \zeta_{k_2}\}]) \\
& + (2n)^{-1} \sum_{s_1=\pm 1} \sum_{s_2=\pm 1} \sum_{k=1}^K \{d_0/v(x_0, 0)\} \{d_k/v(x_0, \zeta_k)\} \\
& \times E(K_h\{W_i(s_1, 0) - x_0\} K_h\{W_i(s_2, \zeta_k) - x_0\} \\
& \times Q[Y_i, W_i(s_1, 0), g\{W_i(s_1, 0), 0\}] Q[Y_i, W_i(s_2, \zeta_k), g\{W_i(s_2, \zeta_k), \zeta_k\}]) \\
= & A_1 + A_2 + A_3,
\end{aligned}$$

where the third equality follows because  $W_i(s, 0)$  does not depend on  $s$ .

By standard calculations, we obtain

$$\begin{aligned}
E(A_1) &= E[E\{A_1|W_i(1, 0)\}] \\
&= E[n^{-1}\{d_0/v(x_0, 0)\}^2 K_h^2\{W_i(1, 0) - x_0\} \beta\{W_i(1, 0), 0\}] \\
&= \frac{1}{nh} \{d_0/v(x_0, 0)\}^2 \int K^2(z) f_W(x_0 + hz, 0) \beta(x_0 + hz, 0) dz \\
&= \frac{\gamma}{nh} \{d_0/v(x_0, 0)\}^2 f_W(x_0, 0) \beta(x_0, 0) \{1 + o(1)\}.
\end{aligned}$$

Similarly, for  $E(A_2)$ , all the terms are  $O(n^{-1})$  except when  $k_1 = k_2$  and  $s_1 = s_2$ , and we then have

$$E(A_2) = \frac{\gamma}{2hn} \sum_{k=1}^K \{d_k/v(x_0, \zeta_k)\}^2 f_W(x_0, \zeta_k) \beta(x_0, \zeta_k) \{1 + o(1)\}.$$

It is an easy calculation to see that

$$E(A_3) = O(n^{-1}).$$

Putting all this together, we have

$$\begin{aligned} \text{var} \left[ E \left\{ \widehat{\Lambda}(x_0) | \widetilde{Y} \right\} \right] &= \frac{\gamma f_W(x_0, 0) \beta(x_0, 0) d_0^2}{v^2(x_0, 0) n h} \\ &+ \frac{1}{2} \sum_{k=1}^K \frac{\gamma f_W(x_0, \zeta_k) \beta(x_0, \zeta_k) d_0^2}{v^2(x_0, \zeta_k) n h} + o\{h^4 + (nh)^{-1}\}. \end{aligned}$$
